# Supplementary material
Source: Springer Nature journal article supplement (https://www.springermedizin.de/resource/supplementary/12985_2013_2290_MOESM6_ESM.pdf/9606430)

**A***A/sw/Denmark/19126/93(H1N1)*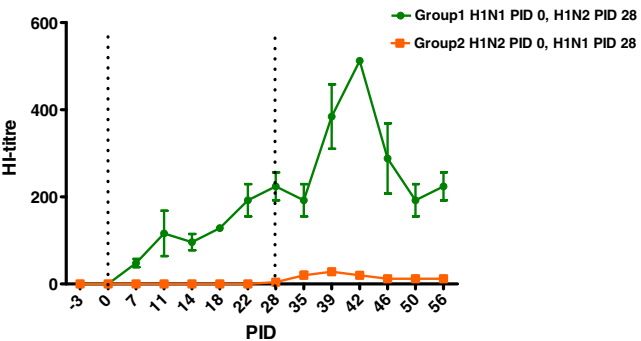**B***A/sw/Denmark/10074/2004(H1N2)*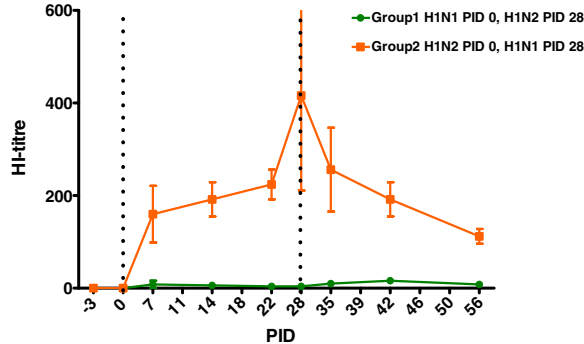

Supplement: MOESM6 [file 9606430]
